# Supplementary material for: Electrochemical water oxidation catalyzed by a mononuclear cobalt complex of a pentadentate ligand: the critical effect of the borate anion
Source: Royal Society of Chemistry journal article supplement (doi:10.1039/d2nj01154a), 2022-01-01
Supplement: d2nj01154a1.pdf [file d2nj01154a1.pdf]

## Electrochemical water oxidation catalyzed by a mononuclear cobalt complex of pentadentate ligand: the critical effect of borate anion

Haixia Zheng<sup>a,b</sup>, Hui Ye<sup>b</sup>, Tao Xu<sup>b</sup>, Kaibo Zheng<sup>a\*</sup>, Xinyi Xie<sup>c</sup>, Binghui Zhu<sup>c</sup>, Xichao Wang<sup>b</sup>, Junqi Lin<sup>b\*</sup> and Zhijun Ruan<sup>a,b\*</sup>

<sup>a</sup> College of Materials and Chemical Engineering, Key laboratory of inorganic nonmetallic crystalline and energy conversion materials, China Three Gorges University, Yichang, 443002, China. Email: zhengkbo@126.com

<sup>b</sup> Hubei Key Laboratory of Processing and Application of Catalytic Materials, College of Chemistry and Chemical Engineering, Huanggang Normal University, Huanggang, 438000, China. Email: linjunqi@hgnu.edu.cn; ruanzhijun@hgnu.edu.cn

<sup>c</sup> Institute for New Energy Materials & Low Carbon Technologies, School of Materials Science and Engineering, Tianjin University of Technology, Tianjin 300384, China.

**Table S1** Crystallographic data and processing parameters for complex **1**

|                      |                                                                         |
|----------------------|-------------------------------------------------------------------------|
| Crystal data         |                                                                         |
| Chemical formula     | C <sub>19</sub> H <sub>31</sub> CoN <sub>5</sub> O·2(ClO <sub>4</sub> ) |
| <i>M<sub>r</sub></i> | 603.32                                                                  |

---

|                                                                            |                                    |
|----------------------------------------------------------------------------|------------------------------------|
| Crystal system, space group                                                | Monoclinic, $P2_1/c$               |
| Temperature (K)                                                            | 273                                |
| $a, b, c$ (Å)                                                              | 9.0629 (18), 33.221 (8), 8.842 (2) |
| $\beta$ (°)                                                                | 104.732 (9)                        |
| $V$ (Å <sup>3</sup> )                                                      | 2574.6 (11)                        |
| $Z$                                                                        | 4                                  |
| Radiation type                                                             | Mo $K\alpha$                       |
| $\mu$ (mm <sup>-1</sup> )                                                  | 0.93                               |
| Crystal size (mm)                                                          | 0.22 x 0.20 x 0.17                 |
| Data collection                                                            |                                    |
| Diffractometer                                                             | Bruker <i>APEX-II</i> CCD          |
| Absorption correction                                                      | —                                  |
| No. of measured, independent and observed [ $I > 2\sigma(I)$ ] reflections | 29858, 5876, 4110                  |
| $R_{\text{int}}$                                                           | 0.069                              |
| $(\sin \theta/\lambda)_{\text{max}}$ (Å <sup>-1</sup> )                    | 0.649                              |
| Refinement                                                                 |                                    |
| $R[F^2 > 2\sigma(F^2)]$ , $wR(F^2)$ , $S$                                  | 0.064, 0.203, 1.04                 |
| No. of reflections                                                         | 5876                               |
| No. of parameters                                                          | 329                                |
| H-atom treatment                                                           | H-atom parameters constrained      |
| $\Delta\rho_{\text{max}}$ , $\Delta\rho_{\text{min}}$ (e Å <sup>-3</sup> ) | 1.35, -0.64                        |

---

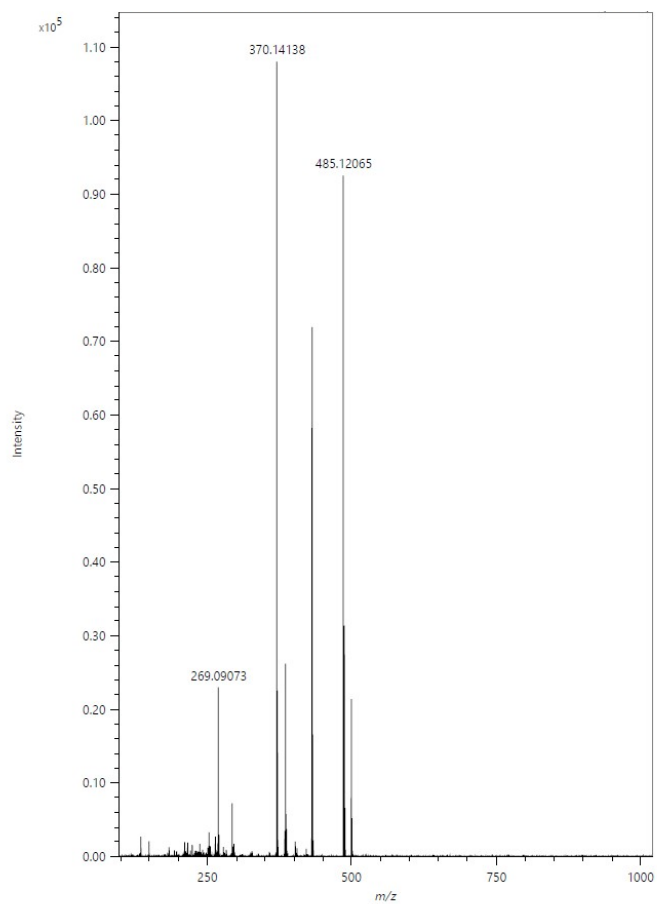

**Fig. S1** High-resolution mass spectrum of complex **1** in pure water, the  $m/z = 485.12065$  is ascribed to  $[\text{Co}(\text{N}3\text{Py}2)(\text{ClO}_4)]^+$  (calc. 485.12).

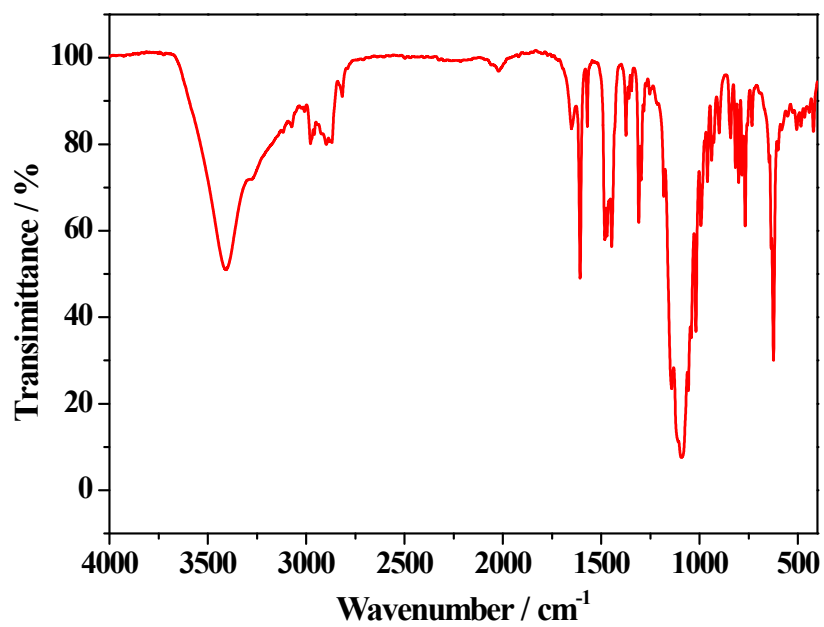

**Fig. S2** Infrared spectrum of complex **1**.

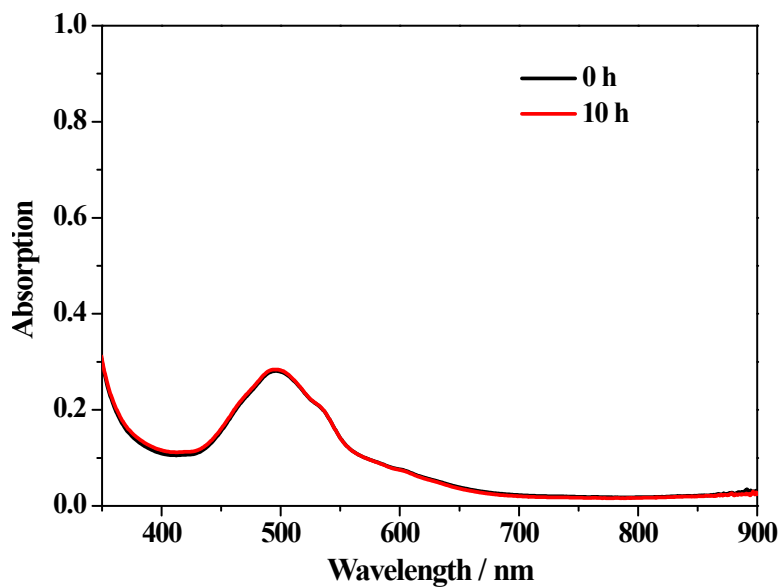

**Fig. S3** The absorption spectrum of 10 mM of **1** before and after 10 h aging in 0.1 M borate buffer solution at pH 9.0.

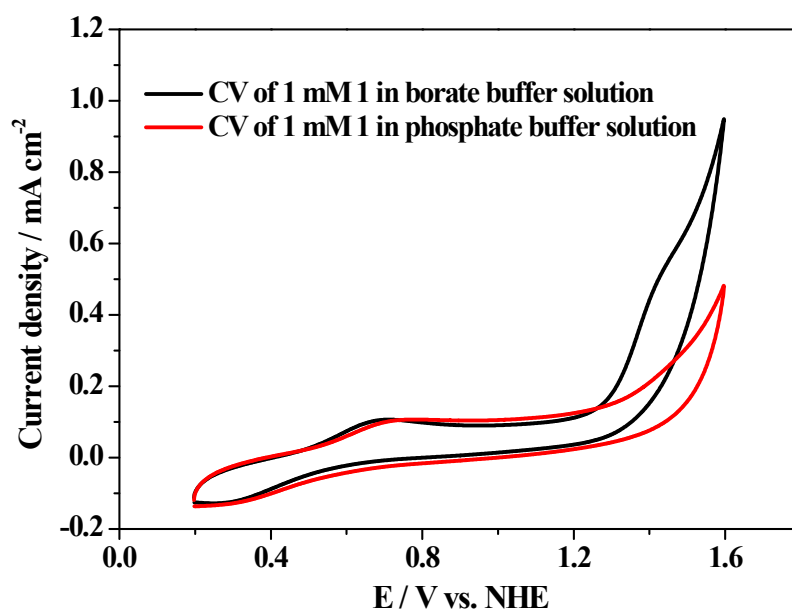

**Fig. S4** CV curves of 1 mM of **1** in 0.1 M borate buffer solution at pH 9.0 (black) and 0.1 M phosphate buffer solution at pH 9.0 (red). GC electrode as working electrode, scan rate = 100 mV/s.

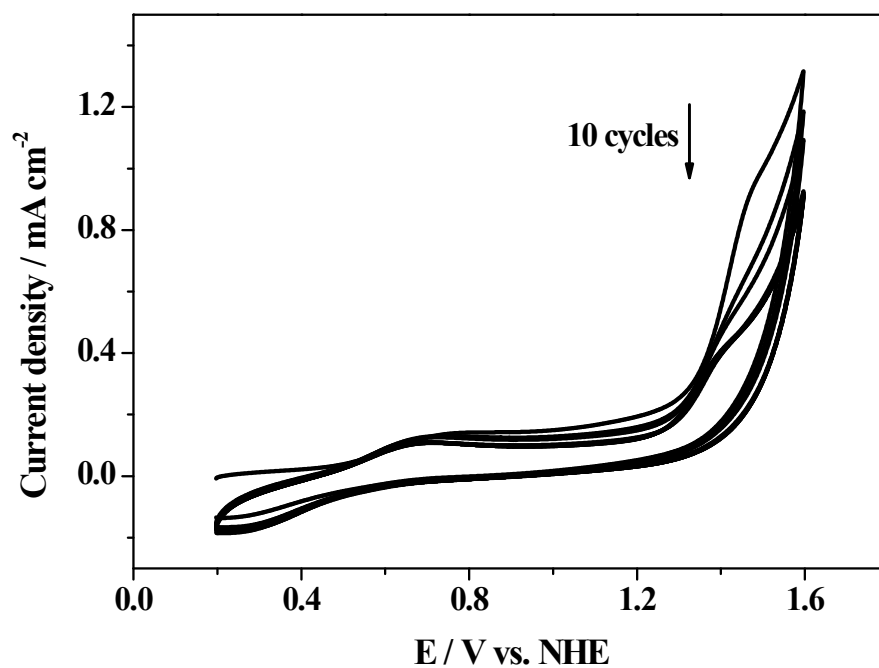

Fig. S5 Ten consecutive CV cyclic scan curves of 1 mM complex 1 in borate buffer solution.

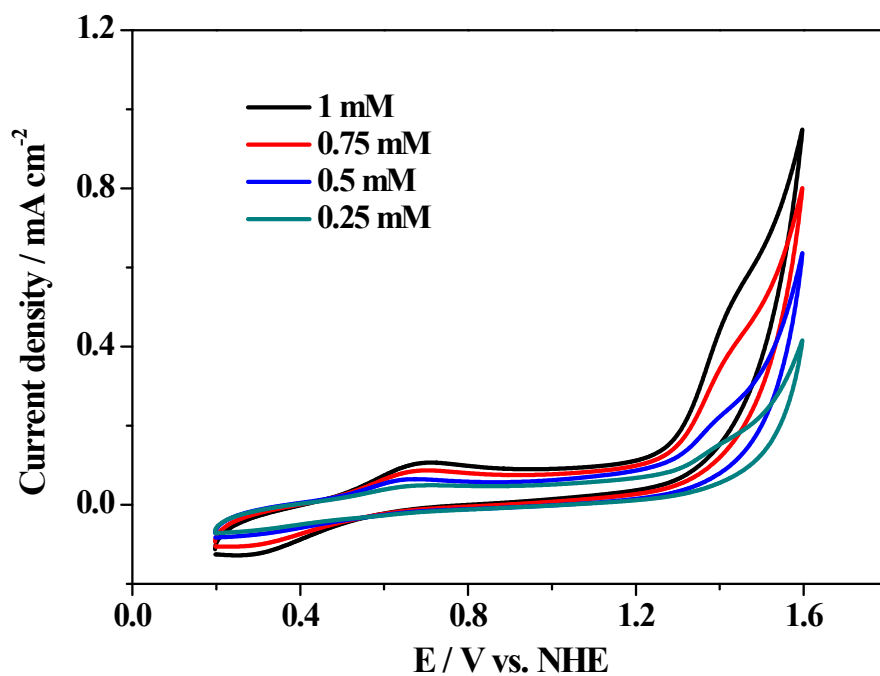

Fig. S6 CV of complex 1 with various concentrations in borate buffer solution at pH 9.0.

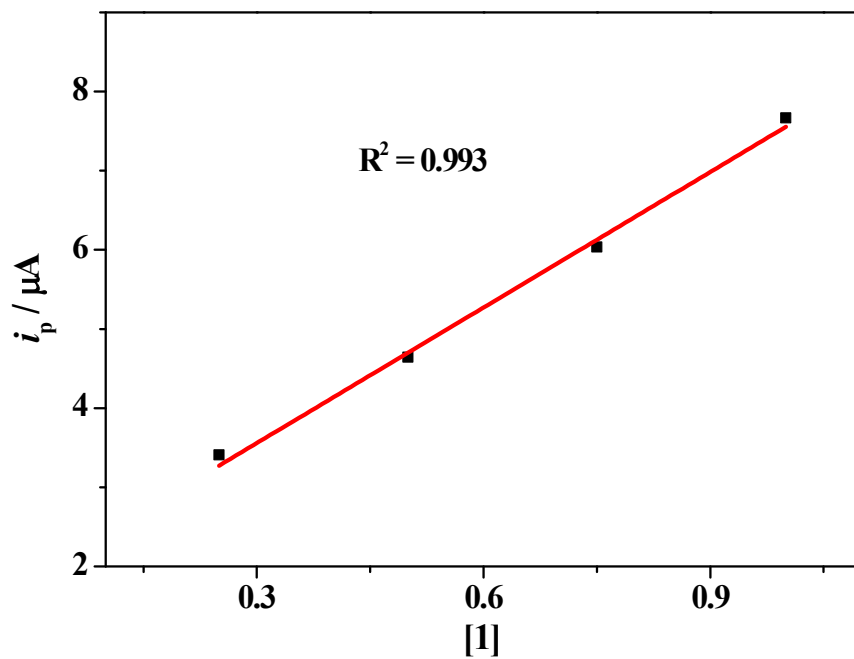

**Fig. S7** Relationship between current of anodic wave and concentration of complex **1**, scan rate = 100 mV/s, 0.1 M borate buffer solution at pH 9.0 as electrolyte.

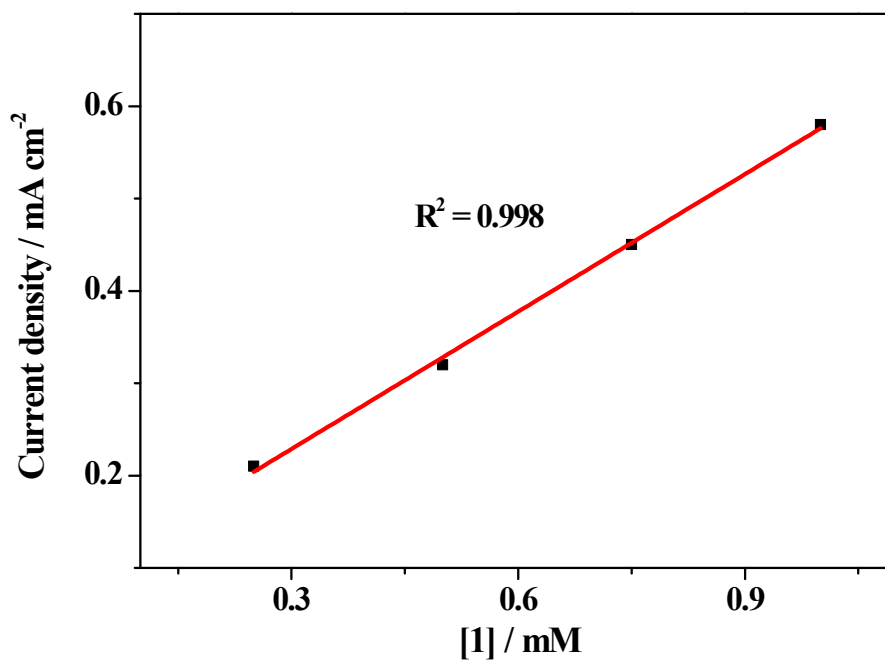

**Fig. S8** Relationship between current density at 1.45 V vs. NHE and concentration of complex **1**, scan rate = 100 mV/s, 0.1 M borate buffer solution at pH 9.0 as electrolyte.

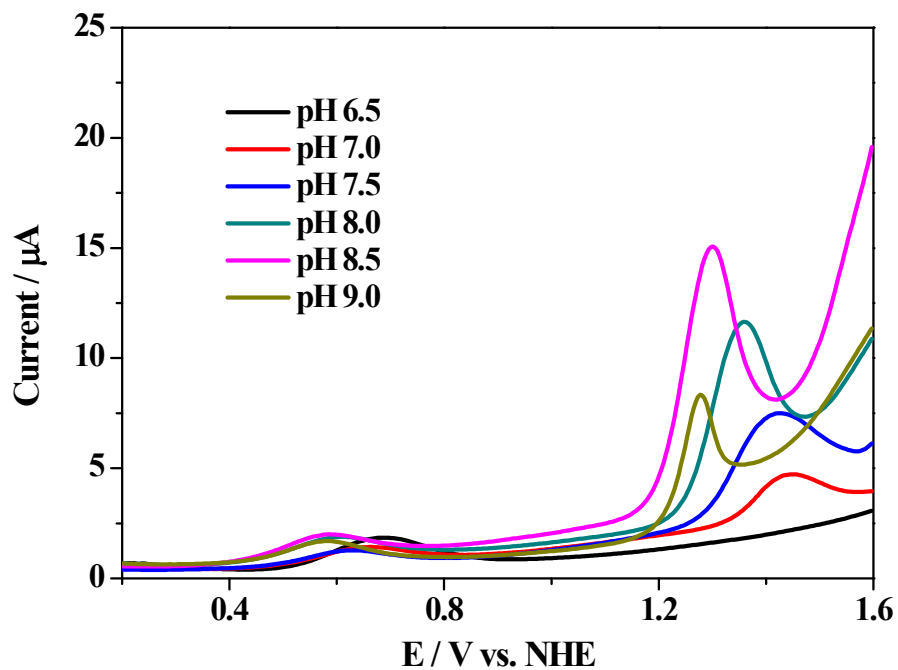

**Fig. S9** Differential pulse voltammetry (DPV) examination of 1 mM complex **1** in 0.1 M borate buffer solution at various pH values.

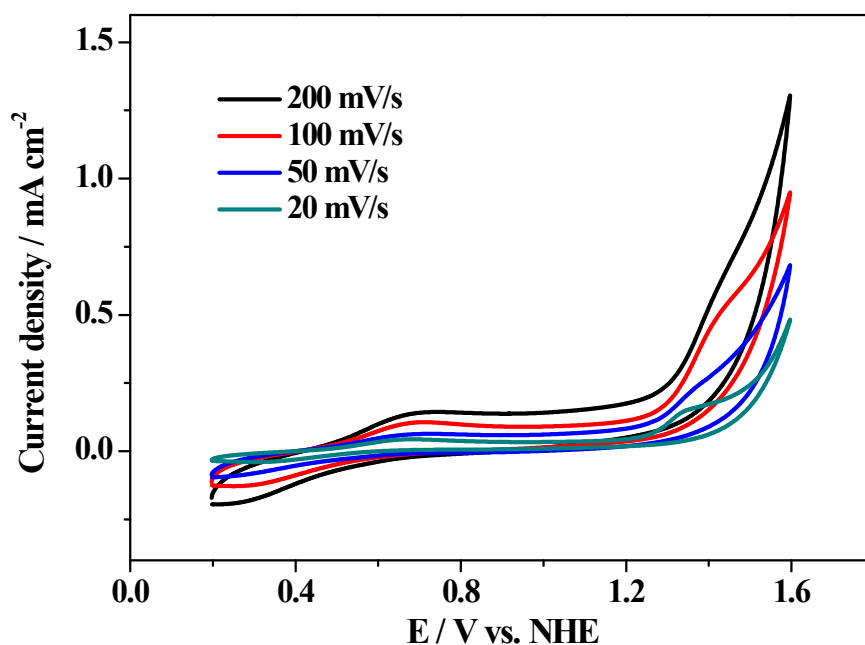

**Fig. S10** CV of 1.0 mM of **1** with various scan rates, 0.1 M borate buffer solution as electrolyte.

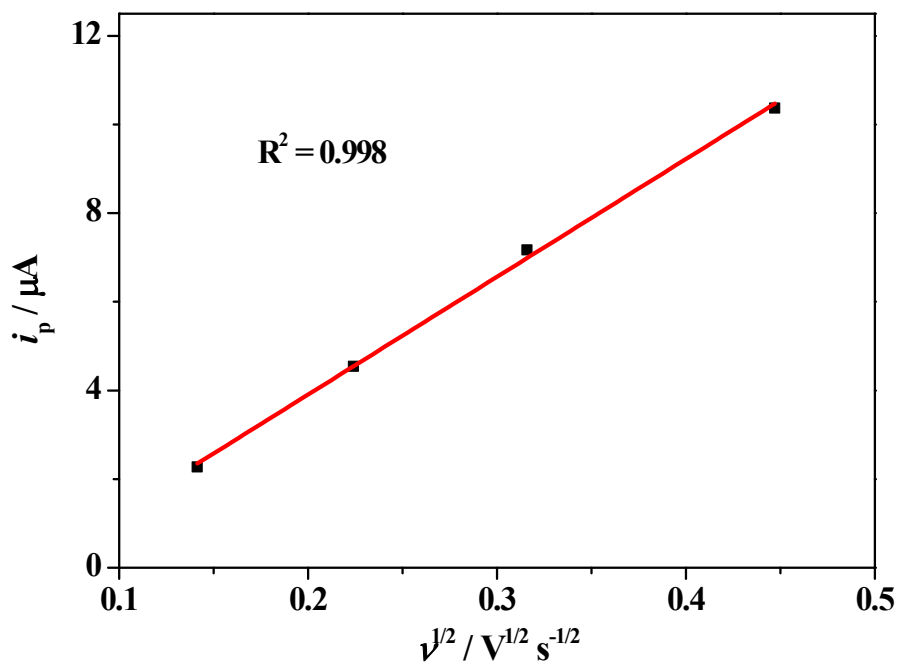

**Fig. S11** Dependence of oxidation wave current density of the non-catalytic process of 1 mM of **1** on the square root of scan rates, 0.1 M borate buffer solution as electrolyte.

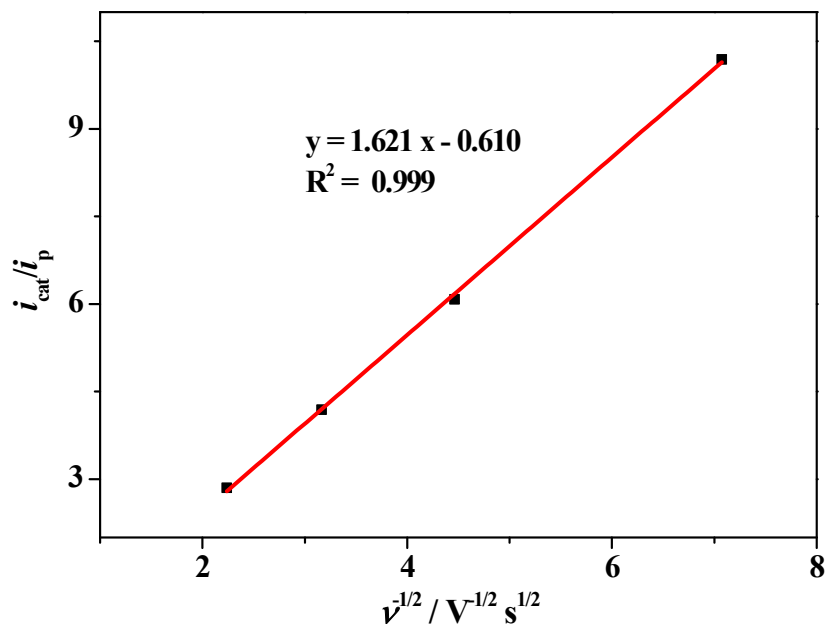

**Fig. S12** Plots of the ratio of  $i_{cat}$  to  $i_d$  of complex **1** versus the reciprocal of the square root of scan rate.



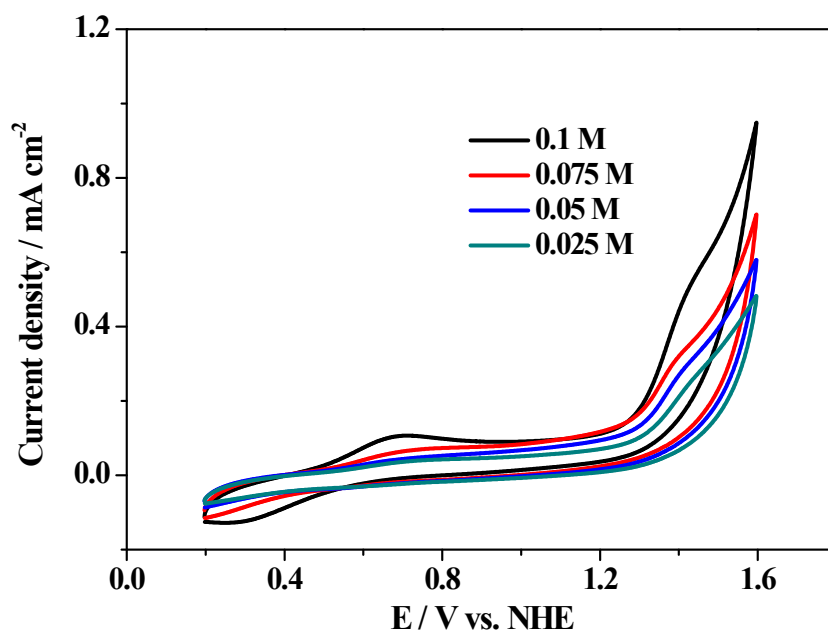

**Fig. S13** CV of 1.0 mM of **1** in borate buffer solution with various concentrations as electrolyte (pH 9.0). The ionic strength of electrolyte was maintained with the addition of NaClO<sub>4</sub>.

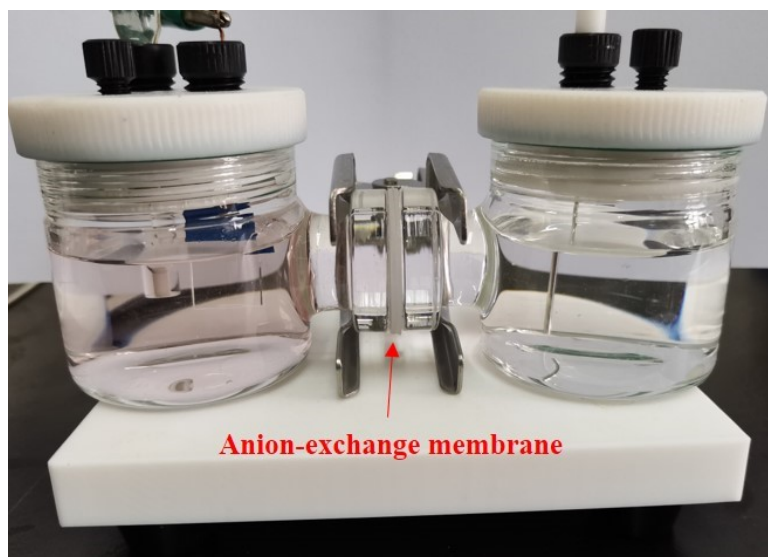

**Fig. S14** Picture of the two-compartment cell used for CPE experiments; 0.1 M borate buffer solution containing 1 mM complex **1** was used as electrolyte and potential was controlled at 1.45 V vs. NHE.

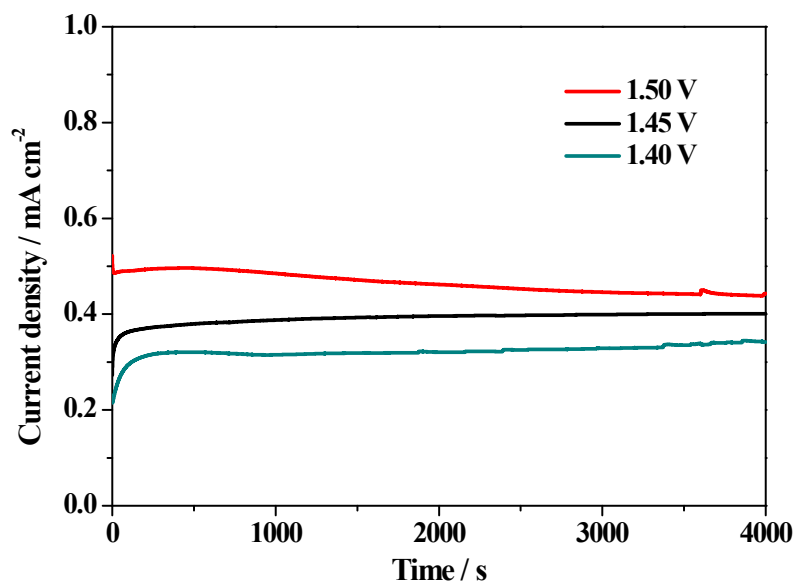

**Fig. S15** The  $i$ - $t$  curves obtained in CPE experiment of 1 mM of complex **1** at different potential (vs. NHE) using 0.1 M borate buffer at pH 9.0 as electrolyte and ITO electrode ( $1\text{ cm} \times 2\text{ cm}$  with  $1\text{ cm}^2$  immersed in electrolyte).

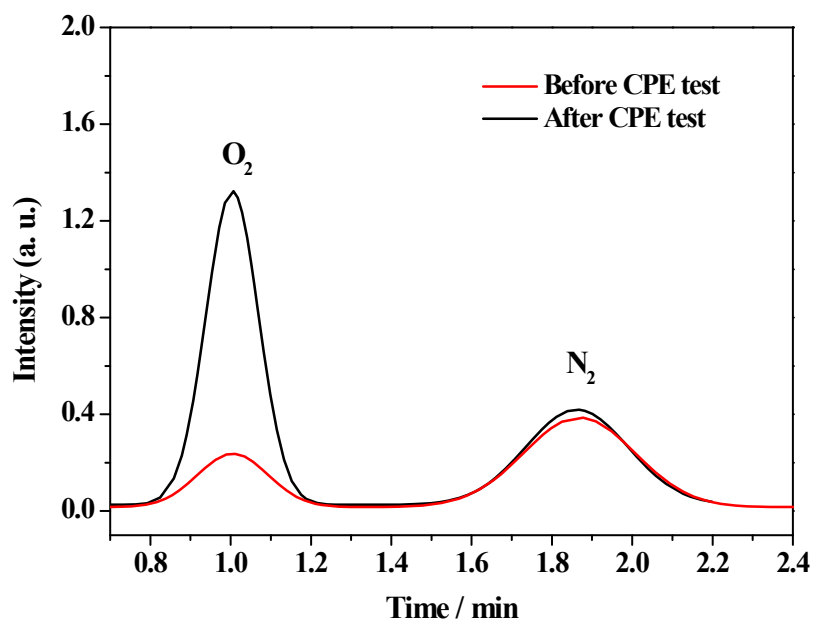

**Fig. S16** Gas chromatographic trace before and after CPE test at 1.45 V vs. NHE.

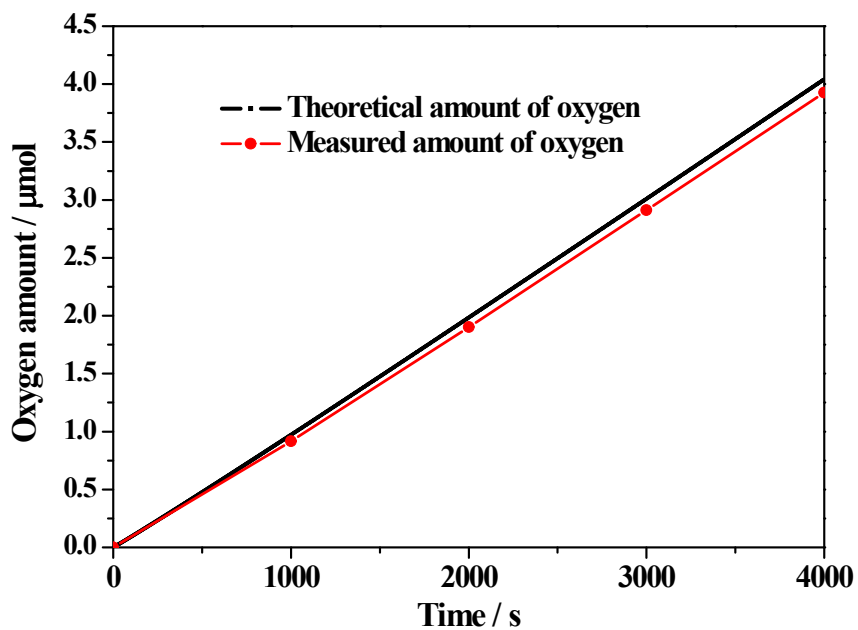

**Fig. S17** Faradaic efficiency of O<sub>2</sub> evolution for complex **1** under electrolysis of 4000 s at 1.45 V (vs. NHE) in 0.1 M borate buffer solution at pH 9.0.

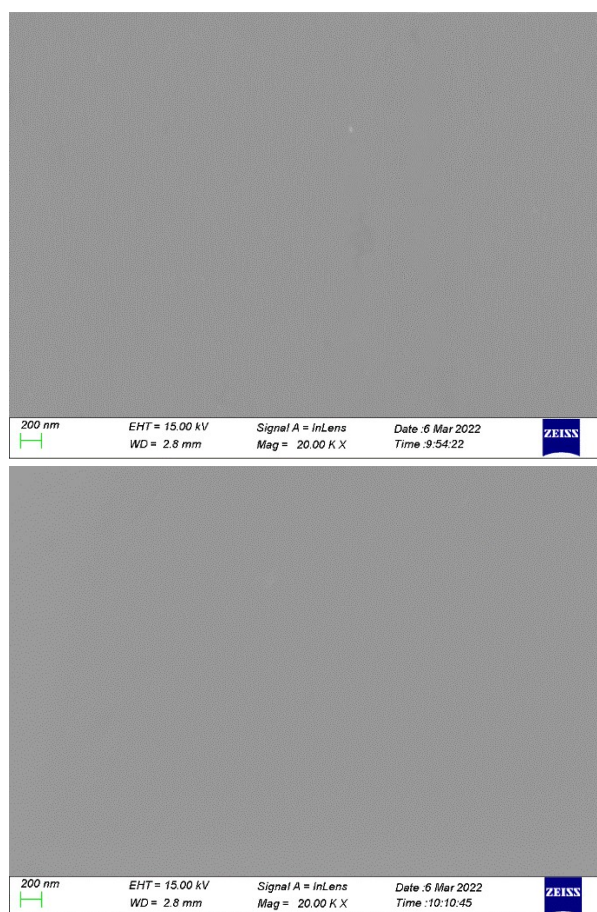

**Fig. S18** SEM images of the surface of ITO electrode before (top) and after (bottom) 4 h CPE experiments (1.45 V vs. NHE) of 1 mM of **1** in 0.1 M borate buffer solution at pH 9.0.

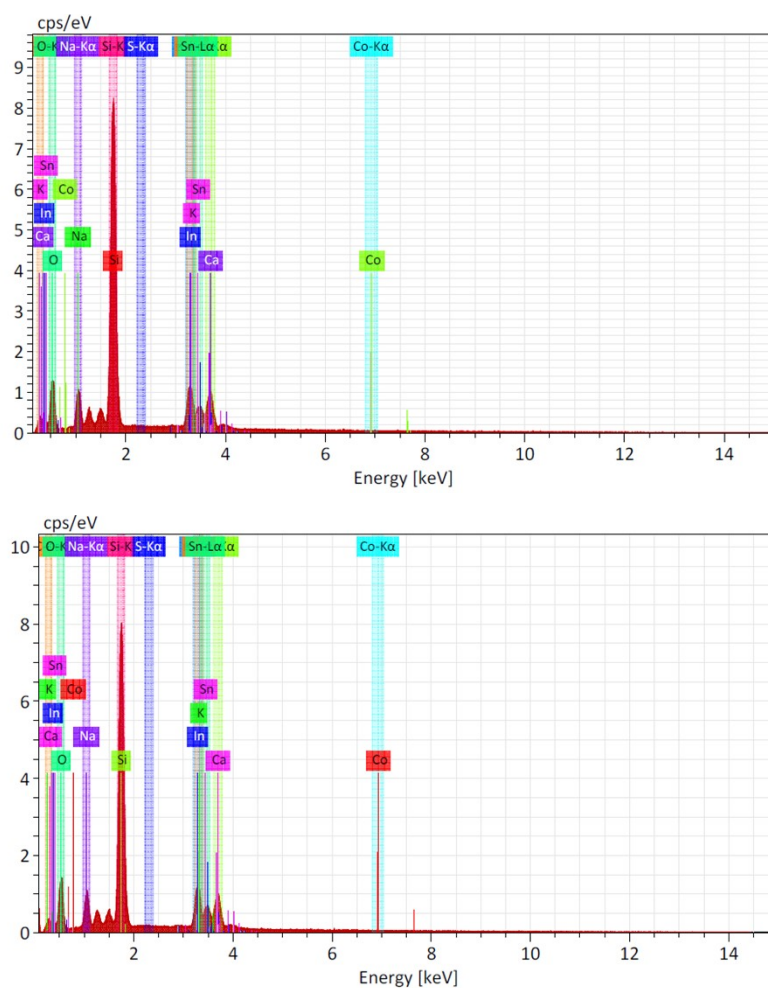

**Fig. S19** EDX analysis of the surface of ITO electrode before (top) and after (bottom) 4 h CPE experiments of 1 mM of **1** in 0.1 M borate buffer solution at pH 9.0.

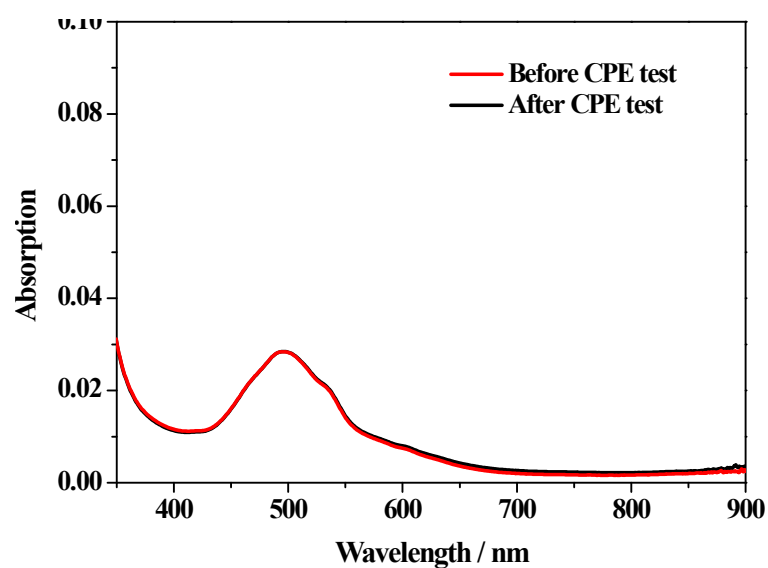

**Fig. S20** UV-vis absorption spectra of 1 mM of **1** before and after the CPE test at 1.45 V vs. NHE.
